# Supplementary material for: Two Modes of the Axonal Interferon Response Limit Alphaherpesvirus Neuroinvasion
Source: PubMed Central journal article supplement — mBio. 2016 Feb 2;7(1):e02145-15. doi: 10.1128/mBio.02145-15 (PMC4742712; doi:10.1128/mbio.02145-15), 2016-02-02
Supplement: mbo001162663s1.pdf [file mbo001162663s1.pdf]

## 1 **Supplemental Experimental Procedures**

2 **Neuronal cultures.** Briefly, 35-mm plastic tissue culture dishes (Falcon) or optical plastic dishes  
3 (Ibidi) were coated with 500  $\mu\text{g/ml}$  of poly-DL-ornithine (Sigma Aldrich) and 10  $\mu\text{g/ml}$  of  
4 natural mouse laminin (Life Technologies). Evenly spaced grooves were etched on the dishes  
5 before a silicone grease-coated tri-chamber (Tyler Research) was placed. SCGs were trypsinized  
6 and triturated before plating in the S compartment. Neurons were maintained in neurobasal  
7 medium (Gibco) supplemented with 100 ng/ml nerve growth factor 2.5S (Invitrogen), 2% B27  
8 (Gibco) and 1% penicillin and streptomycin with 2 mM glutamine (Life Technologies). 48 h  
9 after plating, 1 mM cytosine-D-arabinofuranoside (Sigma-Aldrich) was added for 2 days to kill  
10 non-neuronal dividing cells. Neurons were cultured for 14-21 days prior to experiments.

11

12 **Western blot analysis.** Dissociated neurons or cell bodies from the S compartment were lysed  
13 in radioimmunoprecipitation assay (RIPA) buffer without sodium deoxycholate, supplemented  
14 with 1 mM dithiothreitol (DTT) and protease inhibitor cocktail (Sigma-Aldrich). Lysates were  
15 kept on ice for 30 min, sonicated to shear genomic DNA, and centrifuged at 11,000 rpm at 4°C.  
16 Supernatants were transferred into new tubes and mixed with 5x Laemmli buffer. Axons from N  
17 compartment were directly lysed in 2x Laemmli buffer on dish. Samples were heated at 95°C for  
18 10 min before resolved by 8% SDS polyacrylamide gel electrophoresis. Gels were transferred to  
19 nitrocellulose membranes (Whatman) using semidry transfer (Biorad). After transfer, membranes  
20 were incubated in 5% non-fat dry milk in tris-buffered saline (TBS) solution for 1 h at room  
21 temperature. Immunoblots were performed using primary and secondary antibodies in 1% milk  
22 TBS solution. Membranes were incubated with chemiluminescent substrates (Supersignal West

23 Pico or Dura, Thermo scientific). Protein bands were visualized by exposure on HyBlot CL  
24 (Denville scientific) blue X-ray films.

25

26 **Immunofluorescence Staining.** Samples were fixed with 4% paraformaldehyde (Electron  
27 Microscopy Sciences) in phosphate-buffered saline (PBS) for 10 min and permeablized with ice-  
28 cold methanol for 10 min at  $-20^{\circ}\text{C}$ . Samples were then incubated in PBS containing 3% bovine  
29 serum albumin (BSA) (Sigma-Aldrich) for 1 h prior to staining with antibodies and DAPI diluted  
30 in 3% BSA in PBS. Teflon tri-chambers were removed before mounting with Aqua-Poly/Mount  
31 (Polysciences) and covering with glass coverslips (Fisher Scientific).

32

33 **Quantitative Reverse Transcription-PCR.** Primers are: rat Mx1 (Fw:  
34 CCTGCTTGGCAAAGAGACTGAC, Rv: TTGGCAGCGATTACAGATGTGG); rat IFIT1  
35 (Fw: CTGAGATGTCACTTCACATGGGG, Rv: GTGCATCCCCAGTGAGTTCT); rat GBP2  
36 (Fw: CTGCATTATGTGACAGAGCTG, Rv: GAGCCCACACAAAGGTTGGAAA); rat  $\beta$ -actin  
37 (Fw: CATGAAACTACATTCAATTC, Rv: GTAACAGTCCGCCTAGAAGC).

38

39 **Mass spectrometry-based proteomic sample preparation and data analysis.** Briefly, axons  
40 were washed twice with PBS and collected in NuPAGE LDS sample buffer (Life Technologies).  
41 Samples were treated with 100 mM DTT at  $70^{\circ}\text{C}$  for 10 min and then with 100 mM  
42 iodoacetamide at room temperature for 30 min protected from light. One-fifth of each sample  
43 was resolved by SDS-PAGE (4 - 12% NuPAGE BisTris gels, Invitrogen) and stained with  
44 Coomassie blue. Coomassie stained gel lanes were excised, cut into 1 mm slices, and pooled into  
45 8 fractions per lane. Proteins were digested in-gel with trypsin (20  $\mu\text{l}$  of 12.5 ng/ $\mu\text{l}$  trypsin in 50

46 mM ammonium bicarbonate) overnight at 37 °C. Peptides were extracted in 0.5% formic  
47 acid/50% ACN, desalted, and half of each sample was analyzed by nanoliquid chromatography-  
48 tandem mass spectrometry using a Dionex Ultimate 3000 nanoRSLC coupled online to an LTQ  
49 Orbitrap XL mass spectrometer with an nanoelectrospray Flex ion source (ThermoFisher  
50 Scientific). Peptides were separated by reverse phase chromatography (Acclaim PepMap RSLC  
51 C<sub>18</sub>, 1.8 μm, 75 μm x 25 cm) over a 90 min linear gradient from 4-35% mobile phase B (mobile  
52 phase B = 97% acetonitrile containing 0.1% formic acid and mobile phase A = Water containing  
53 0.1% formic acid). Peptide ions were selected for MS analysis using a data-dependent  
54 acquisition method that permitted label-free spectral counting analysis, as previously described  
55 (1) but with some modifications. Specifically, one MS acquisition cycle collected a single MS  
56 spectrum in the orbitrap detector (resolution = 60,000; Preview scan enabled) and up to ten  
57 MS/MS fragmentation scans on the most intense ions using dynamic exclusion. Acquisition  
58 cycles were repeated throughout the LC gradient.

59

60 MS/MS spectra were extracted, filtered, and searched using Proteome Discoverer/SEQUEST  
61 software (v1.4 ThermoFisher Scientific) against a protein sequence database containing rat and  
62 mouse compiled from the UniProt Swiss-Prot repository (2013-08), and common contaminants  
63 (total of 74,017 entries). Protein sequences were reversed for estimation of global peptide and  
64 protein false discovery rates (FDR). SEQUEST peptide-spectrum matches corresponding to the  
65 same biological replicate (minimum of 3 per condition) were combined and then analyzed in  
66 Scaffold (v4.1) (Proteome Software) using the X!Tandem refinement search strategy.  
67 Probabilities for peptide spectral matches (PSMs) were calculated using Scaffold's Bayesian-  
68 based local FDR scoring model, and then PSMs were assembled into protein groups. Peptide and

69 protein probability thresholds were defined empirically to achieve  $\leq 1\%$  peptide and protein FDR  
70 (minimum of 2 unique sequences). Filtered data were exported to mzIdentML format and  
71 imported into perSPECTives (v2.0.5) (Proteome Software) to perform spectral counting and  
72 statistical analysis. Proteins were clustered and weighted spectrum counts were calculated using  
73 the “shared evidence clustering” method and summarization at the biosample level. Weighted  
74 spectral counts were normalized by the average number of unique spectra across all samples  
75 divided by the number of unique spectra in each individual sample. Differential abundance was  
76 calculated separately for (1) IFN $\beta$  versus No Treatment and (2) IFN $\gamma$  versus No Treatment, using  
77 weighted spectral counts and a permutation test with a Benjamini-Hochberg post-test ( $p < 0.05$ )  
78 to correct FDR for multiple comparisons. A protein cluster was considered significant if at least  
79 one member of the cluster achieved statistical significance. Data was exported to Excel for  
80 additional data processing.

81

82 **Detection of L-AHA-Containing Proteins.** Neurons in chambers were incubated in methionine  
83 free media (RPMI 1640) for 1 hour, followed by addition of 50 mM L-azidohomoalanine (L-  
84 AHA) and IFN $\beta$  or IFN $\gamma$  in the N compartment for 2 h. Methionine in newly synthesized  
85 proteins was substituted with L-AHA, which contains an azide group that was subsequently  
86 covalently linked to alkyne-bearing Alexa Fluor 488 (Life Technologies). Click reaction was  
87 performed by using Click-IT Cell Reaction Buffer Kit (Life Technologies).

88

## 89 **Supplemental Reference**

90 1. **Tsai YC, Greco TM, Cristea IM.** 2014. Sirtuin 7 plays a role in ribosome biogenesis  
91 and protein synthesis. *Mol Cell Proteomics* **13**:73-83.
